# Supplementary material for: A new oxapalladacycle generated via ortho C–H activation of phenylphosphinic acid: an efficient catalyst for Markovnikov-type additions of E–H bonds to alkynes
Source: Royal Society of Chemistry journal article supplement (doi:10.1039/c0cc03436c), 2010-12-16

## Electronic Supplementary Information

### A New Oxapalladacycle Generated via *Ortho* C-H Activation of Phenylphosphinic Acid: Efficient Catalyst for Markovnikov-Type Additions of E-H Bonds to Alkynes

Qing Xu,<sup>ab</sup>, Ruwei Shen,<sup>a</sup> Yutaka Ono,<sup>a</sup> Ritsuko Nagahata,<sup>a</sup> Shigeru Shimada,<sup>a</sup> Midori Goto,<sup>a</sup> and Li-Biao Han<sup>a\*</sup>

<sup>a</sup> National Institute of Advanced Industrial Science and Technology (AIST), Tsukuba, Ibaraki 305-8565, Japan

<sup>b</sup> College of Chemistry and Materials Engineering, Wenzhou University, Wenzhou 325035, China

*libiao-han@aist.go.jp*

|                                                                                                                 |     |
|-----------------------------------------------------------------------------------------------------------------|-----|
| General.....                                                                                                    | S2  |
| X-ray Crystallography.....                                                                                      | S2  |
| Characterizations of Adducts.....                                                                               | S2  |
| Preparation of Complexes <b>4b</b> and <b>5a</b> .....                                                          | S6  |
| Monitoring <sup>31</sup> P NMR Spectra of <b>4b</b> -Catalyzed Addition of Ph <sub>2</sub> P(O)H to 1-Octyne... | S7  |
| <sup>1</sup> H NMR and <sup>13</sup> C NMR Spectra of New Products.....                                         | S10 |
| ESI-TOF MS of <b>3</b> in CH <sub>2</sub> Cl <sub>2</sub> .....                                                 | S17 |
| ESI-TOF MS of <b>3</b> in CHCl <sub>3</sub> (1% DMSO).....                                                      | S18 |

**General.** All reactions were carried out under nitrogen atmosphere in a sealed NMR or a Schlenk tube unless otherwise noted. Solvents were dried and purified under nitrogen before use by standard procedure.  $^1\text{H}$ ,  $^{13}\text{C}$  and  $^{31}\text{P}$  NMR spectra were recorded on a JEOL LA-500 instrument (500 MHz for  $^1\text{H}$ , 125.4 MHz for  $^{13}\text{C}$ , and 201.9 MHz for  $^{31}\text{P}$  NMR spectroscopy). Unless otherwise noted,  $\text{CDCl}_3$  was used as the solvent. Chemical shift values for  $^1\text{H}$  and  $^{13}\text{C}$  were referred to internal  $\text{Me}_4\text{Si}$  (0 ppm), and that for  $^{31}\text{P}$  was referred to  $\text{H}_3\text{PO}_4$  (85% solution in  $\text{D}_2\text{O}$ , 0 ppm). Mass spectra were measured on a Shimadzu GCMS-QP2010 spectrometer (EI). HRMS and elemental analysis was performed by the Analytical Center at the National Institute of Advanced Industrial Science and Technology. Preparative GPC was carried out on a Japan Analytical Industry LC-908 instrument (1H and 2H columns) with  $\text{CHCl}_3$  as eluent.

**X-ray Crystallography.** Data collection was performed on a Bruker Smart Apex CCD diffractometer (Mo  $K\alpha$  radiation, graphite monochromator). Data were corrected for absorption. For complex **3**, the structures were solved by the Patterson method.<sup>1</sup> Structure refinement was carried out by full-matrix least squares on  $F^2$ . All non-hydrogen atoms were refined anisotropically, with a similar U restraint for some of carbon atoms (C8-C12). All hydrogen atoms were located at calculated positions and refined with a riding model. Structure solution and refinement were performed using Crystal Structure software package<sup>2</sup> with SHELX-97 program.<sup>3</sup>

1) PATY: Beurskens, P. T.; Admiraal, G.; Behm, H.; Beurskens, G.; Smits, J. M. M. and Smykalla, C. (1991). *Z. f. Kristallogr. Suppl.*4, p.99.

2) CrystalStructure 4.0: Crystal Structure Analysis Package, Rigaku Corporation (2000-2010). Tokyo 196-8666, Japan.

3) SHELX97: Sheldrick, G. M. (2008). *Acta Cryst.* A64, 112-122.

### Characterizations of Adducts

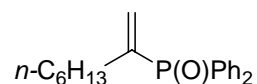

This compound is known: Han, L.-B.; Hua, R.-M.; Tanaka, M. *Angew. Chem. Int. Ed.*

1998, 37, 94.

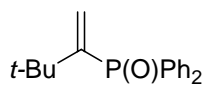

$^1\text{H}$  NMR:  $\delta$  7.69-7.64 (m, 4H), 7.52-7.49 (m, 2H), 7.46-7.42 (m, 4H), 5.99 (d,  $J_{\text{P-H}} = 45.2$  Hz, 1H), 5.20 (d,  $J_{\text{P-H}} = 22.0$  Hz, 1H), 1.27 (s, 9H).  $^{31}\text{P}$  NMR:  $\delta$  34.8. M/S ( $m/z$ ) 284 (42,  $\text{M}^+$ ), 228 (60), 227 (100), 201 (36). This compound is known: (a) Dobashi, N.; Fuse, K.; Hoshino, T.; Kanada, J.; Kashiwabara, T.; Kobata, C.; Nune, S. K.; Tanaka, M. *Tetrahedron Lett.* **2007**, 48, 4669. (b) Takaki, K.; Takeda, M.; Koshiji, G.; Shishido, T.; Takehira, K. *Tetrahedron Lett.* **2001**, 42, 6357.

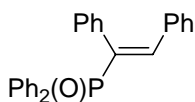

This compound is known: Han, L.-B.; Hua, R.-M.; Tanaka, M. *Angew. Chem. Int. Ed.* **1998**, 37, 94.

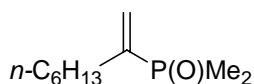

$^1\text{H}$  NMR:  $\delta$  5.92 (d,  $J_{\text{P-H}} = 19.5$  Hz, 1H), 5.86 (d,  $J_{\text{P-H}} = 39.1$  Hz, 1H), 2.24-2.19 (m, 2H), 1.55 (d,  $J_{\text{P-H}} = 12.2$  Hz, 6H), 1.56-1.49 (m, 2H), 1.37-1.31 (m, 6H), 0.90 (t,  $J_{\text{H-H}} = 6.1$  Hz, 3H).  $^{13}\text{C}$  NMR:  $\delta$  145.8 (d,  $J_{\text{C-P}} = 87.8$  Hz), 125.9 (d,  $J_{\text{C-P}} = 7.2$  Hz), 32.1, 31.6 (d,  $J_{\text{C-P}} = 11.4$  Hz), 29.4, 28.5 (d,  $J_{\text{C-P}} = 6.2$  Hz), 23.0, 16.6 (d,  $J_{\text{C-P}} = 69.2$  Hz), 14.5.  $^{31}\text{P}$  NMR:  $\delta$  35.3. M/S ( $m/z$ ) 187 ( $\text{M}^+-1$ ), 173, 159, 145, 131, 104, 93, 78. HRMS Calcd for  $\text{C}_{10}\text{H}_{21}\text{OP}$ : 188.1330; found: 188.1325.

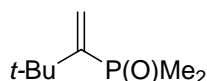

$^1\text{H}$  NMR:  $\delta$  5.75 (d,  $J_{\text{P-H}} = 42.7$  Hz, 1H), 5.54 (d,  $J_{\text{P-H}} = 22.0$  Hz, 1H), 1.64-1.57 (d,  $J_{\text{P-H}} = 12.2$  Hz, 6H), 1.32 (s, 9H).  $^{13}\text{C}$  NMR:  $\delta$  156.5 (d,  $J_{\text{C-P}} = 82.7$  Hz), 122.6 (d,  $J_{\text{C-P}} = 11.4$  Hz), 38.0 (d,  $J_{\text{C-P}} = 9.3$  Hz), 30.4 (d,  $J_{\text{C-P}} = 4.1$  Hz), 20.4 (d,  $J_{\text{C-P}} = 70.3$  Hz).  $^{31}\text{P}$  NMR:  $\delta$  39.2. HRMS Calcd for  $\text{C}_8\text{H}_{17}\text{OP}$ : 160.1017; found: 160.1013.

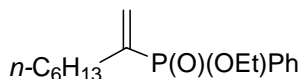

This compound is known: Han, L.-B.; Zhang, C.; Yazawa, H.; Shimada, S. *J. Am. Chem. Soc.* **2004**, 126, 5080.

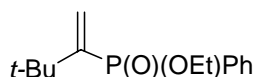

$^1\text{H NMR}$ :  $\delta$  7.81-7.77 (m, 2H), 7.53-7.30 (m, 1H), 7.48-7.43 (m, 2H), 5.90 (d,  $J_{\text{P-H}} = 44.0$  Hz, 1H), 5.82 (d,  $J_{\text{P-H}} = 22.0$  Hz, 1H), 4.13-4.06 (m, 1H), 3.98-3.90 (m, 1H), 1.32 (t,  $J_{\text{H-H}} = 7.4$  Hz, 3H), 1.22 (s, 9H).  $^{13}\text{C NMR}$ :  $\delta$  152.1 (d,  $J_{\text{C-P}} = 117.8$  Hz), 133.1 (d,  $J_{\text{C-P}} = 129.2$  Hz), 132.165 (d,  $J_{\text{C-P}} = 3.1$  Hz), 132.161 (d,  $J_{\text{C-P}} = 10.3$  Hz), 128.7 (d,  $J_{\text{C-P}} = 12.4$  Hz), 127.5 (d,  $J_{\text{C-P}} = 10.3$  Hz), 60.9 (d,  $J_{\text{C-P}} = 6.2$  Hz), 37.0 (d,  $J_{\text{C-P}} = 11.4$  Hz), 30.7 (d,  $J_{\text{C-P}} = 4.1$  Hz), 16.8 (d,  $J_{\text{C-P}} = 6.2$  Hz).  $^{31}\text{P NMR}$ :  $\delta$  34.9. HRMS Calcd for  $\text{C}_{14}\text{H}_{21}\text{O}_2\text{P}$ : 252.1279; found: 252.1280.

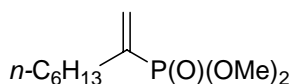

This compound is known: Han, L.-B.; Tanaka, M. *J. Am. Chem. Soc.* **1996**, *118*, 1571.

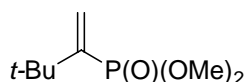

$^1\text{H NMR}$ :  $\delta$  6.03 (d,  $J_{\text{P-H}} = 23.2$  Hz, 1H), 5.90 (d,  $J_{\text{P-H}} = 48.8$  Hz, 1H), 3.72 (d,  $J_{\text{P-H}} = 11.0$  Hz, 6H), 1.23 (s, 9H).  $^{13}\text{C NMR}$ :  $\delta$  147.9 (d,  $J_{\text{C-P}} = 163.3$  Hz), 128.7 (d,  $J_{\text{C-P}} = 8.3$  Hz), 52.6 (d,  $J_{\text{C-P}} = 5.2$  Hz), 36.0 (d,  $J_{\text{C-P}} = 11.4$  Hz), 30.4 (d,  $J_{\text{C-P}} = 5.2$  Hz).  $^{31}\text{P NMR}$ :  $\delta$  23.0. HRMS Calcd for  $\text{C}_8\text{H}_{17}\text{O}_3\text{P}$ : 192.0915; found: 192.0925.

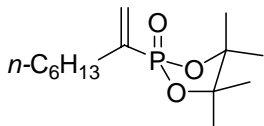

$^1\text{H NMR}$ :  $\delta$  5.88 (d,  $J_{\text{P-H}} = 23.2$  Hz, 1H), 5.60 (d,  $J_{\text{P-H}} = 50.0$  Hz, 1H), 2.39-2.33 (m, 2H), 1.59-1.54 (m, 2H), 1.52 (s, 6H), 1.37-1.30 (m, 6H), 1.34 (s, 6H), 0.88 (t,  $J_{\text{H-H}} = 6.1$  Hz, 3H).  $^{13}\text{C NMR}$ :  $\delta$  141.4 (d,  $J_{\text{C-P}} = 166.4$  Hz), 126.7 (d,  $J_{\text{C-P}} = 9.3$  Hz), 88.6, 33.3 (d,  $J_{\text{C-P}} = 11.4$  Hz), 32.0, 29.2, 28.4 (d,  $J_{\text{C-P}} = 5.2$  Hz), 25.4 (d,  $J_{\text{C-P}} = 2.1$  Hz), 24.5 (d,  $J_{\text{C-P}} = 4.1$  Hz), 23.0, 14.5.  $^{31}\text{P NMR}$ :  $\delta$  31.1. HRMS Calcd for  $\text{C}_{14}\text{H}_{27}\text{O}_3\text{P}$ : 274.1698; found: 274.1695.

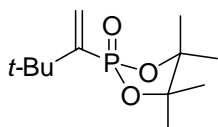

$^1\text{H NMR}$ :  $\delta$  5.93 (d,  $J_{\text{P-H}} = 24.4$  Hz, 1H), 5.73 (d,  $J_{\text{P-H}} = 50.0$  Hz, 1H), 1.51 (s, 6H), 1.32 (s, 6H), 1.27 (s, 9H).  $^{13}\text{C NMR}$ :  $\delta$  151.4 (d,  $J_{\text{C-P}} = 158.1$  Hz), 124.7 (d,  $J_{\text{C-P}} = 8.3$

Hz), 88.4, 36.0 (d,  $J_{C-P} = 13.4$  Hz), 30.9 (d,  $J_{C-P} = 5.2$  Hz), 25.4 (d,  $J_{C-P} = 4.1$  Hz), 24.3 (d,  $J_{C-P} = 5.2$  Hz).  $^{31}\text{P}$  NMR:  $\delta$  31.0. HRMS Calcd for  $\text{C}_{12}\text{H}_{23}\text{O}_3\text{P}$ : 246.1385; found: 246.1381.

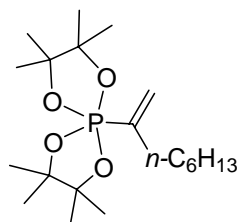

$^1\text{H}$  NMR:  $\delta$  5.76 (d,  $J_{P-H} = 25.6$  Hz, 1H), 5.38 (d,  $J_{P-H} = 56.1$  Hz, 1H), 2.41-2.35 (m, 2H), 1.54-1.49 (m, 2H), 1.35-1.27 (m, 6H), 1.26 (s, 12H), 1.13 (s, 12H), 0.88 (t,  $J_{H-H} = 7.4$  Hz, 3H).  $^{13}\text{C}$  NMR:  $\delta$  151.6 (d,  $J_{C-P} = 204.6$  Hz), 121.0 (d,  $J_{C-P} = 7.2$  Hz), 78.7, 33.3 (d,  $J_{C-P} = 11.4$  Hz), 32.2, 29.6, 28.6 (d,  $J_{C-P} = 8.3$  Hz), 24.9 (d,  $J_{C-P} = 4.1$  Hz), 24.2 (d,  $J_{C-P} = 6.2$  Hz), 23.1 (d,  $J_{C-P} = 1.0$  Hz), 14.5.  $^{31}\text{P}$  NMR:  $\delta$  -31.6. This compound is known: L.-B. Han, Y. Ono, Q. Xu, S. Shimada, *Bull. Chem. Soc. Jpn. in press*.

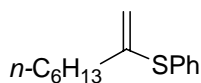

This compound is known: Ishiyama, T.; Nishijima, K.; Miyaura, N.; Suzuki, A. *J. Am. Chem. Soc.* **1993**, *115*, 7219.

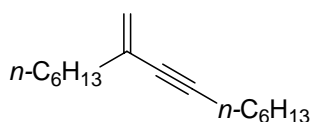

This compound is known: (a) Trost, B. M.; Chan, C.; Ruhter, G. *J. Am. Chem. Soc.* **1987**, *109*, 3486. (b) Trost, B. M.; Sorum, M.T.; Chan, C.; Harms, A. E.; Ruhter, G. *J. Am. Chem. Soc.* **1997**, *119*, 698.

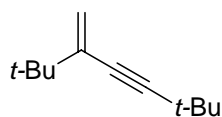

This compound is known: (a) Straub, T.; Haskel, A.; Eisen, M. *J. Am. Chem. Soc.* **1995**, *117*, 6364. (b) Haskel, A.; Straub, T.; Dash, A. K.; Eisen M. S. *J. Am. Chem. Soc.* **1999**, *121*, 3014.

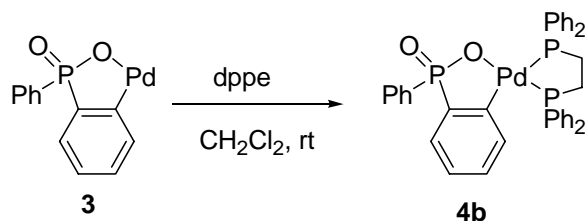

**Preparation of Complex 4b.** The mixture of **3** (64.6 mg, 0.2 mmol) and dppe (80.0 mg, 0.2 mmol) in 4 mL CH<sub>2</sub>Cl<sub>2</sub> was stirred at room temperature under nitrogen till **3** totally dissolved. Standing of the solution filtrate after adding drops of hexane at room temperature gave a white solid, which was collected and washed with CH<sub>2</sub>Cl<sub>2</sub> and hexane. Dec. 168 °C. <sup>1</sup>H NMR (CD<sub>2</sub>Cl<sub>2</sub>): δ 7.99-7.58 (m, 9H), 7.56-6.99 (m, 17H), 6.87-6.84 (m, 1H), 6.61-6.54 (m, 2H), 2.62-2.37 (m, 2H), 2.34-2.21 (m, 1H), 2.16-2.02 (m, 1H). <sup>31</sup>P NMR (CD<sub>2</sub>Cl<sub>2</sub>): δ 61.3 (dd, *J*<sub>P-P</sub> = 29.4 Hz, *J*<sub>P-P</sub> = 7.4 Hz, 1P), 47.2 (dd, *J*<sub>P-P</sub> = 33.1 Hz, *J*<sub>P-P</sub> = 7.4 Hz, 1P), 38.2 (dd, *J*<sub>P-P</sub> = 33.1 Hz, *J*<sub>P-P</sub> = 29.4 Hz, 1P).

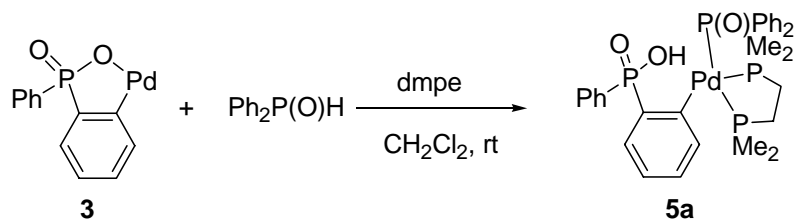

**Preparation of Complex 5a.** The mixture of **3** (0.162 g, 0.5 mmol), dmpe (84 μL, 0.5 mmol) and Ph<sub>2</sub>P(O)H (0.101g, 0.5 mmol) in 5 mL CH<sub>2</sub>Cl<sub>2</sub> was stirred at room temperature under nitrogen till **3** totally dissolved. Standing of the solution filtrate after adding drops of hexane at room temperature gave colorless crystals, which were collected and washed with CH<sub>2</sub>Cl<sub>2</sub> and hexane. <sup>31</sup>P NMR (CD<sub>2</sub>Cl<sub>2</sub>): δ 71.9 (ddd, *J*<sub>P-P</sub> = 447.0 Hz, *J*<sub>P-P</sub> = 34.4 Hz, *J*<sub>P-P</sub> = 7.6 Hz, 1P), 32.1 (dd, *J*<sub>P-P</sub> = 447.0 Hz, *J*<sub>P-P</sub> = 26.8 Hz, 1P), 23.5 (dd, *J*<sub>P-P</sub> = 9.6 Hz, *J*<sub>P-P</sub> = 11.5 Hz, 1P), 20.3 (ddd, *J*<sub>P-P</sub> = 36.3 Hz, *J*<sub>P-P</sub> = 26.7 Hz, *J*<sub>P-P</sub> = 11.5 Hz, 1P).

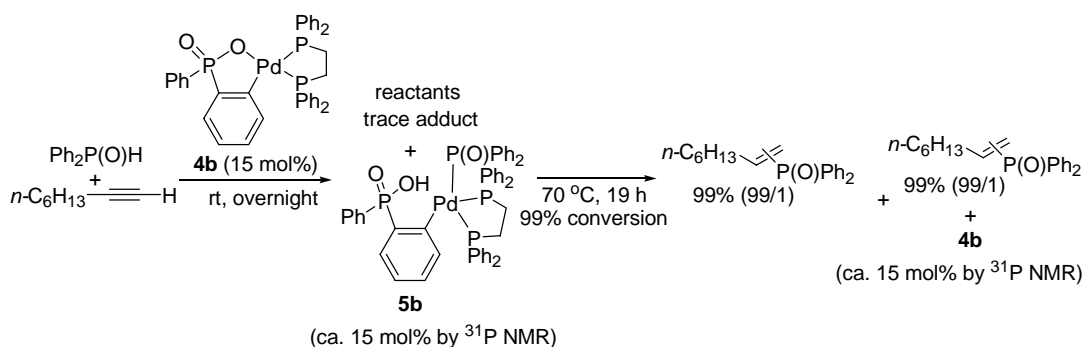

### Monitoring $^{31}\text{P}$ NMR Spectra of $\mathbf{4b}$ -Catalyzed Addition of $\text{Ph}_2\text{P}(\text{O})\text{H}$ to 1-Octyne.

$\mathbf{4b}$  (11 mg, 0.015 mmol, 15 mol%; Chart 1) was added to a mixture of  $\text{Ph}_2\text{P}(\text{O})\text{H}$  (20.2 mg, 0.1 mmol) and 1-octyne (16  $\mu\text{L}$ , 0.11 mmol) dissolved in  $\text{CD}_2\text{Cl}_2$  (0.5 mL) in a NMR tube. After 2 h,  $^{31}\text{P}$  NMR showed the complete conversion of  $\mathbf{4b}$  to  $\mathbf{5b}$  (ca. 15 mol%; Chart 2). The solvent was changed to  $d_8$ -toluene, and the tube was heated at 70  $^\circ\text{C}$  overnight (19 h).  $^{31}\text{P}$  NMR showed that all starting  $\text{Ph}_2\text{P}(\text{O})\text{H}$  and  $\mathbf{5b}$  were completely disappeared, and 99% yield of the adducts (branched/linear ratio = 99/1) together with  $\mathbf{4b}$  (ca.15 mol% ) were obtained (Chart 3).

#### Chart 1. $^{31}\text{P}$ NMR of $\mathbf{4b}$ .

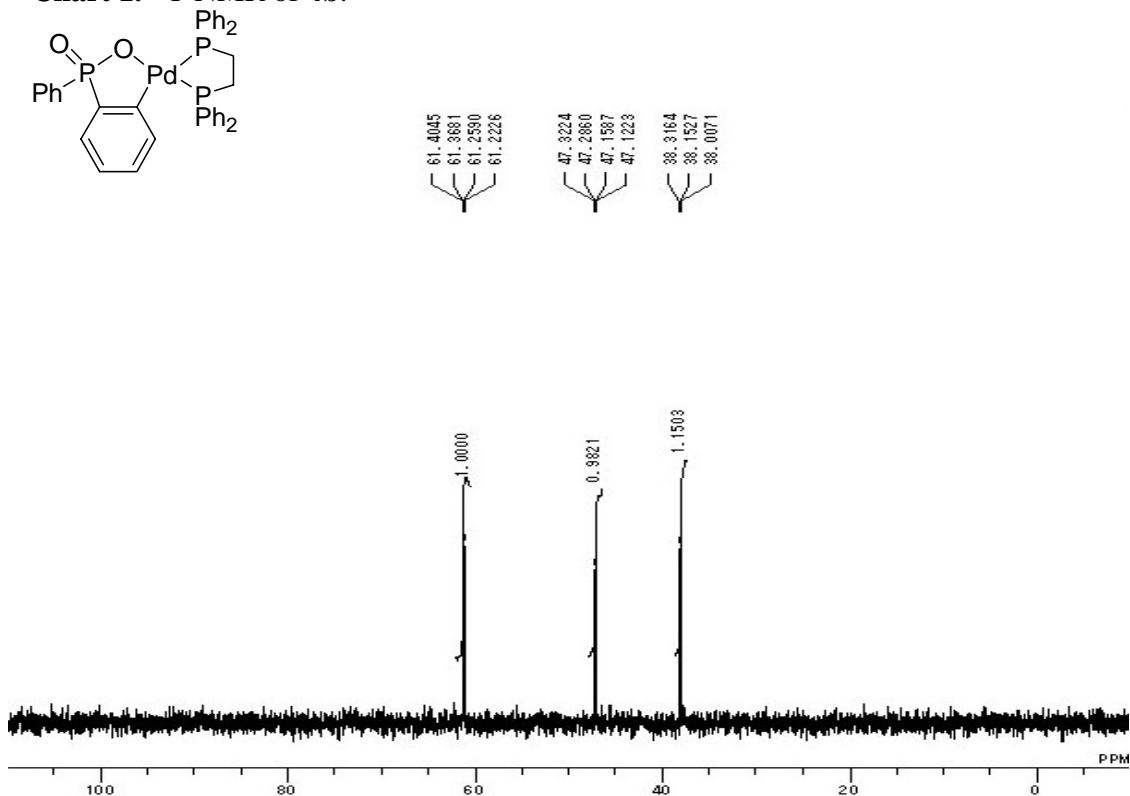

**Chart 2.** After 2 h at room temperature of a mixture of **4b** with  $\text{Ph}_2\text{P}(\text{O})\text{H}$  and 1-octyne: **4b** totally converted to **5b** (ca. 15 mol%); trace adduct (29.97 ppm) was also observed.

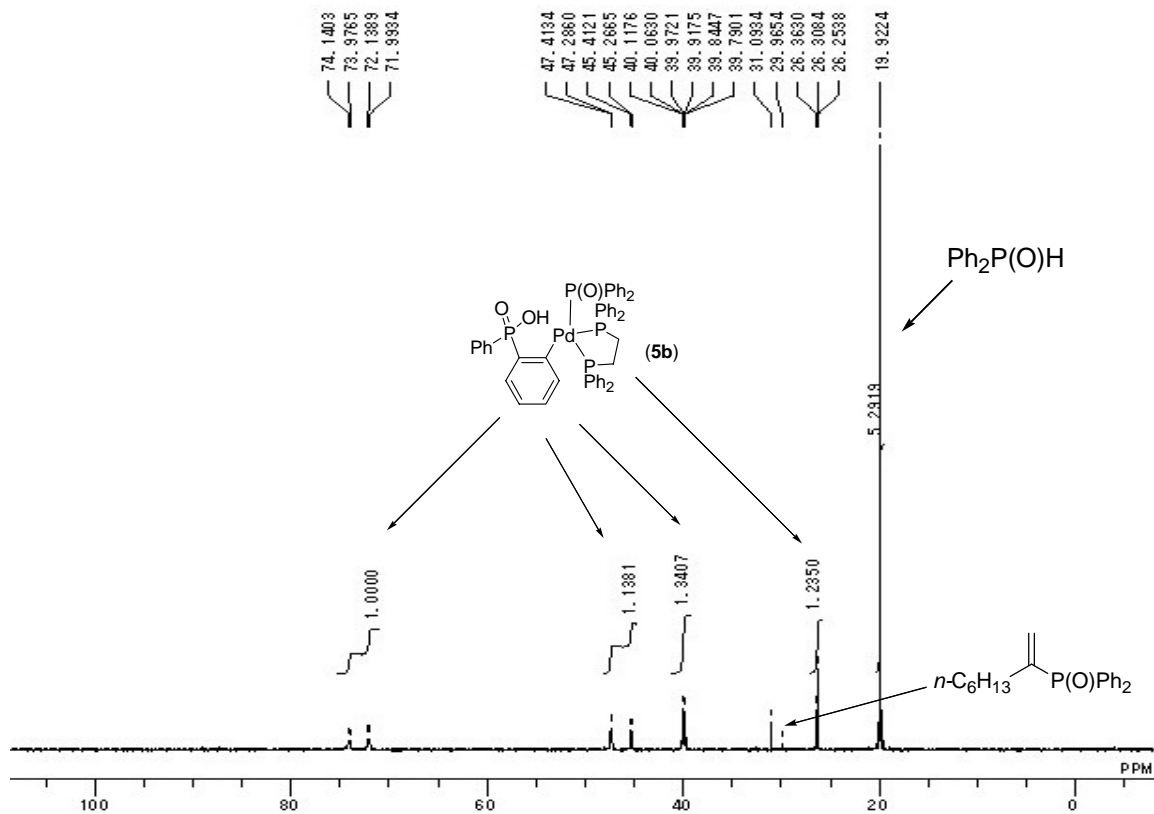



**Chart 3.** Heating at 70 °C for 19 h: Ph<sub>2</sub>P(O)H and **5b** completely disappeared to give the adducts (branched/linear 99/1), while **4b** was regenerated (cat. 15 mol%).

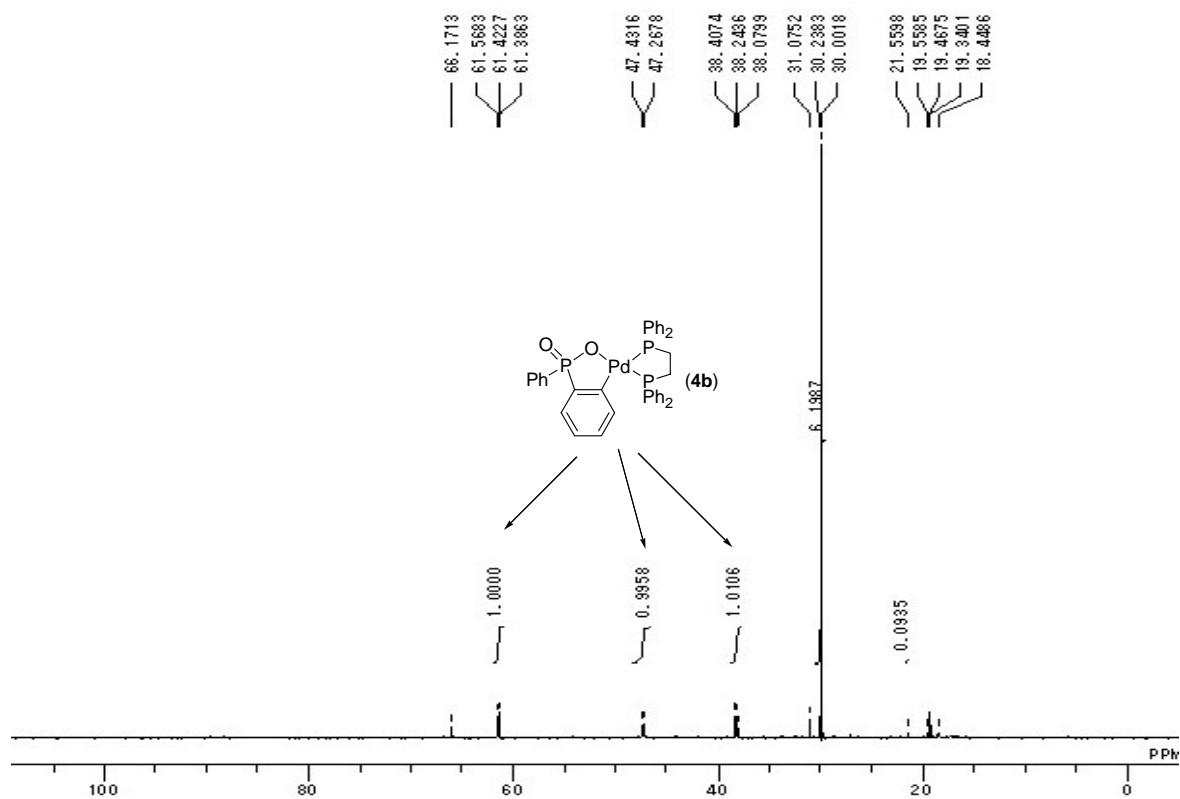

### $^1\text{H}$ NMR and $^{13}\text{C}$ NMR Spectra of New Compounds

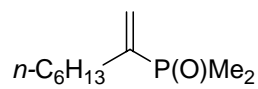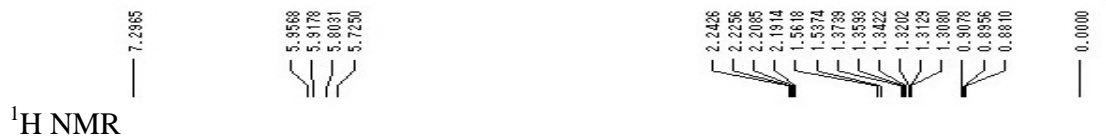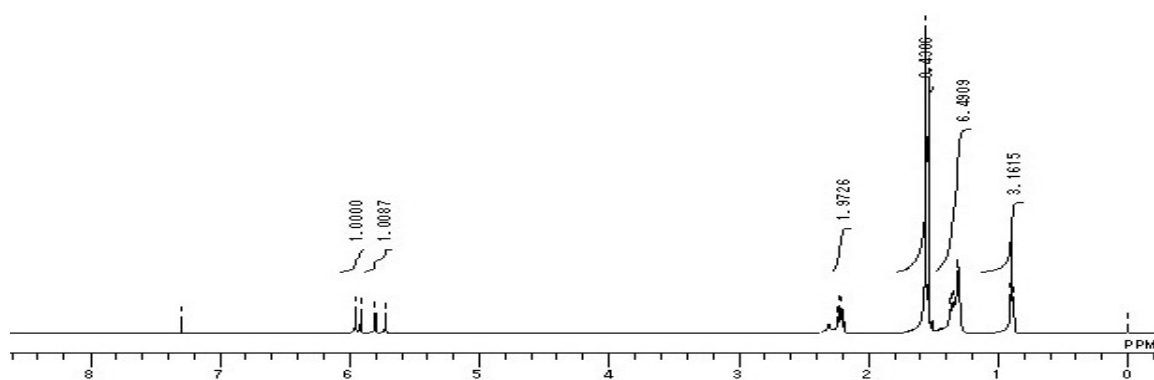

$^{13}\text{C}$  NMR

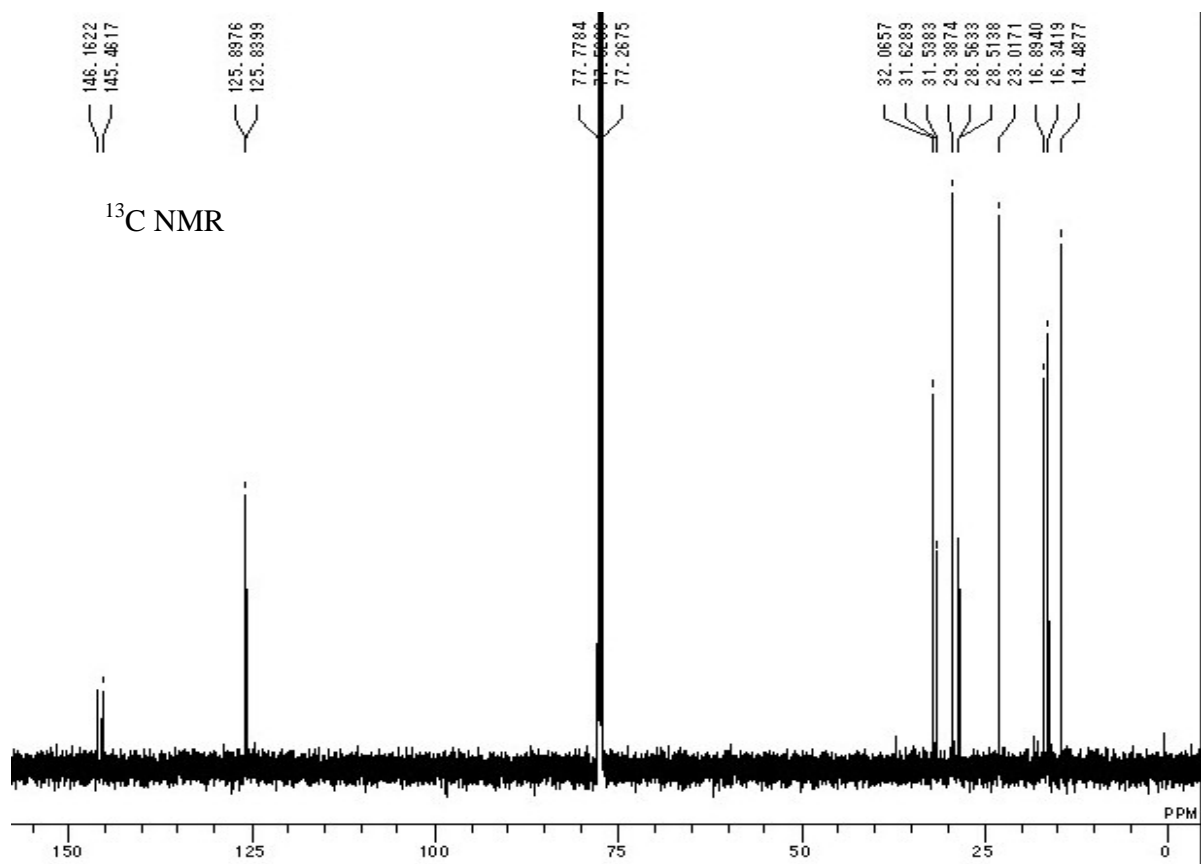

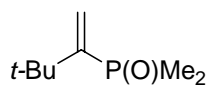

<sup>1</sup>H NMR

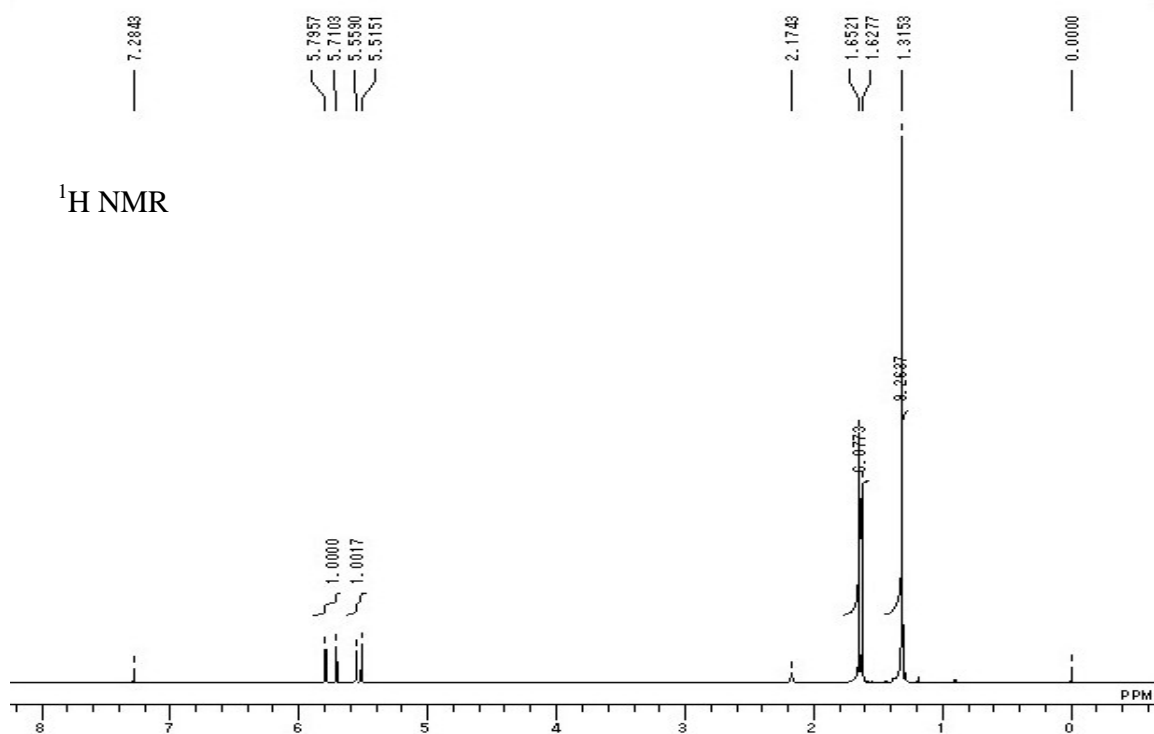

<sup>13</sup>C NMR

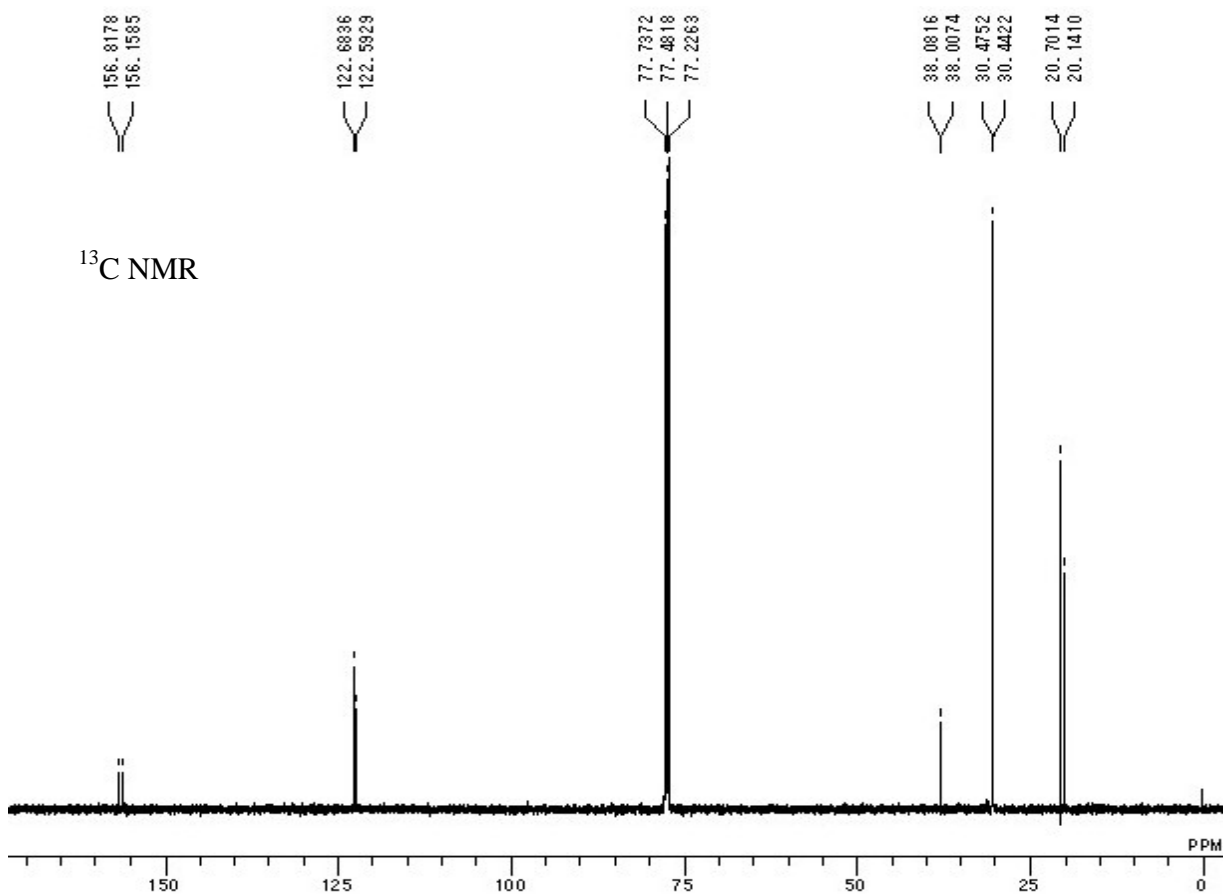

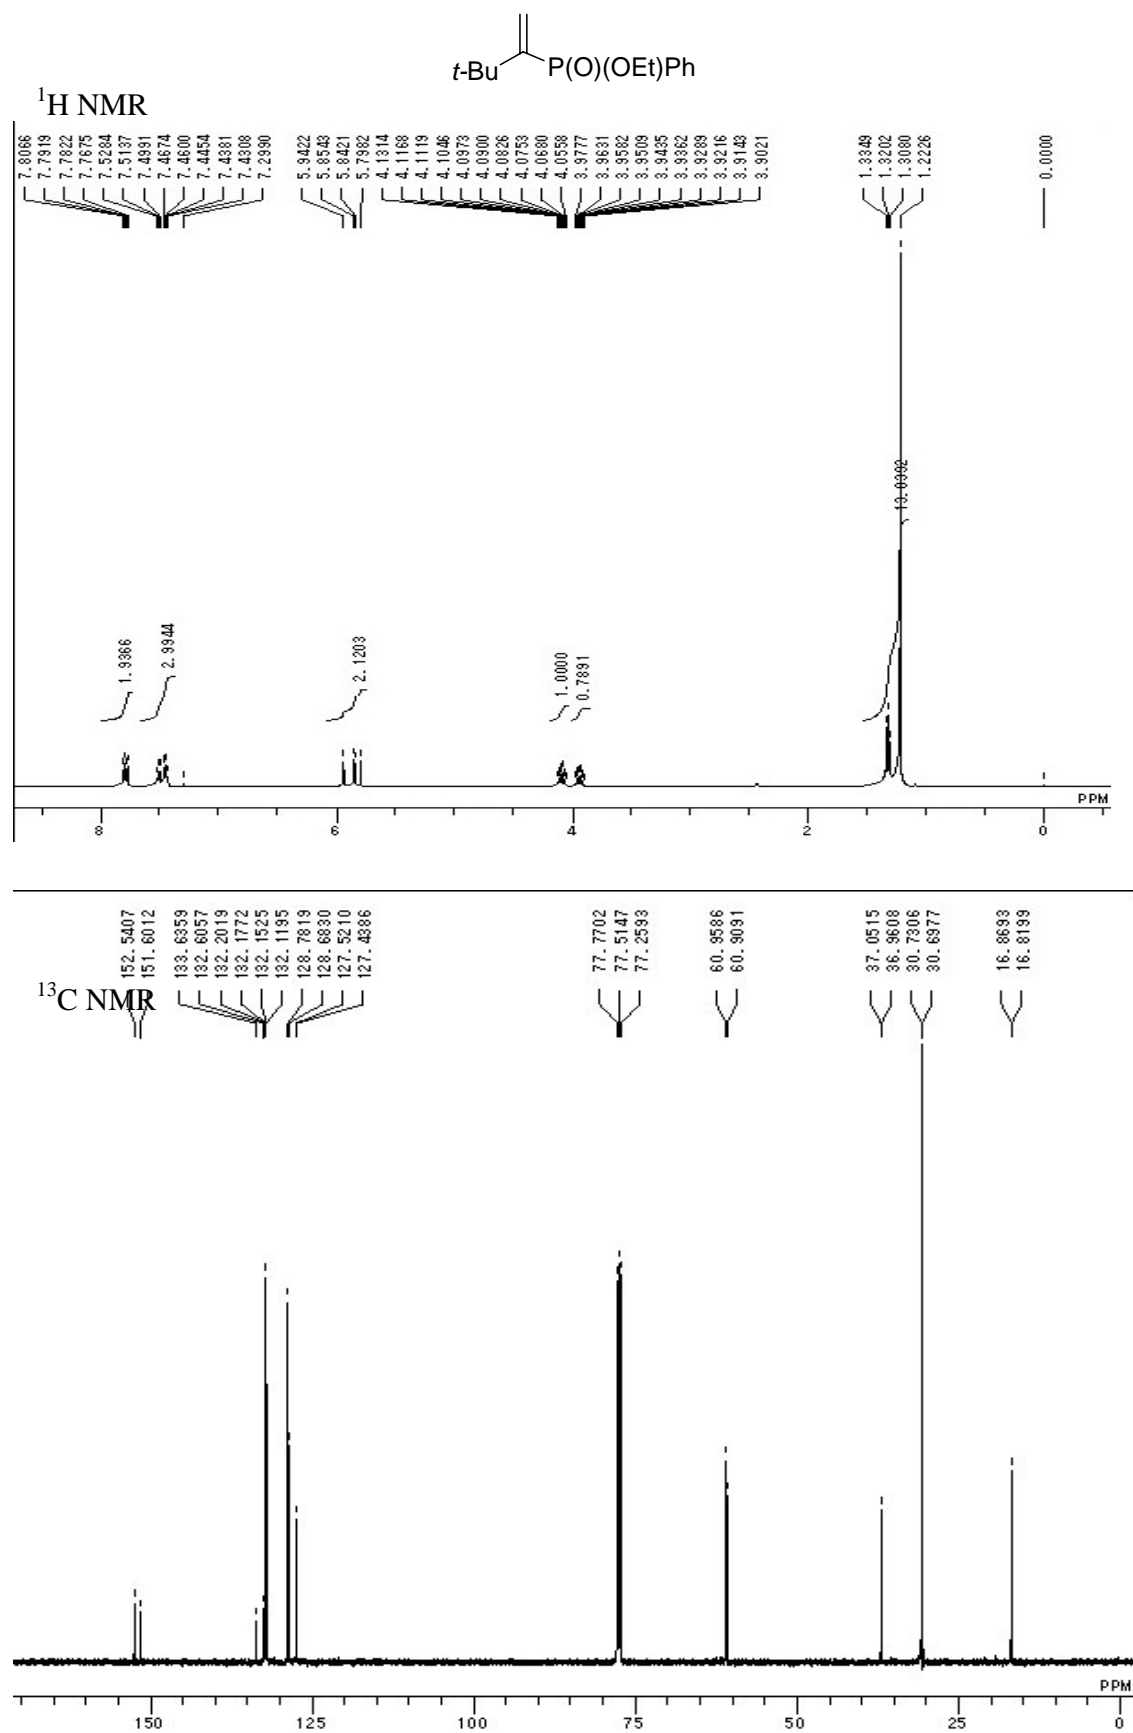

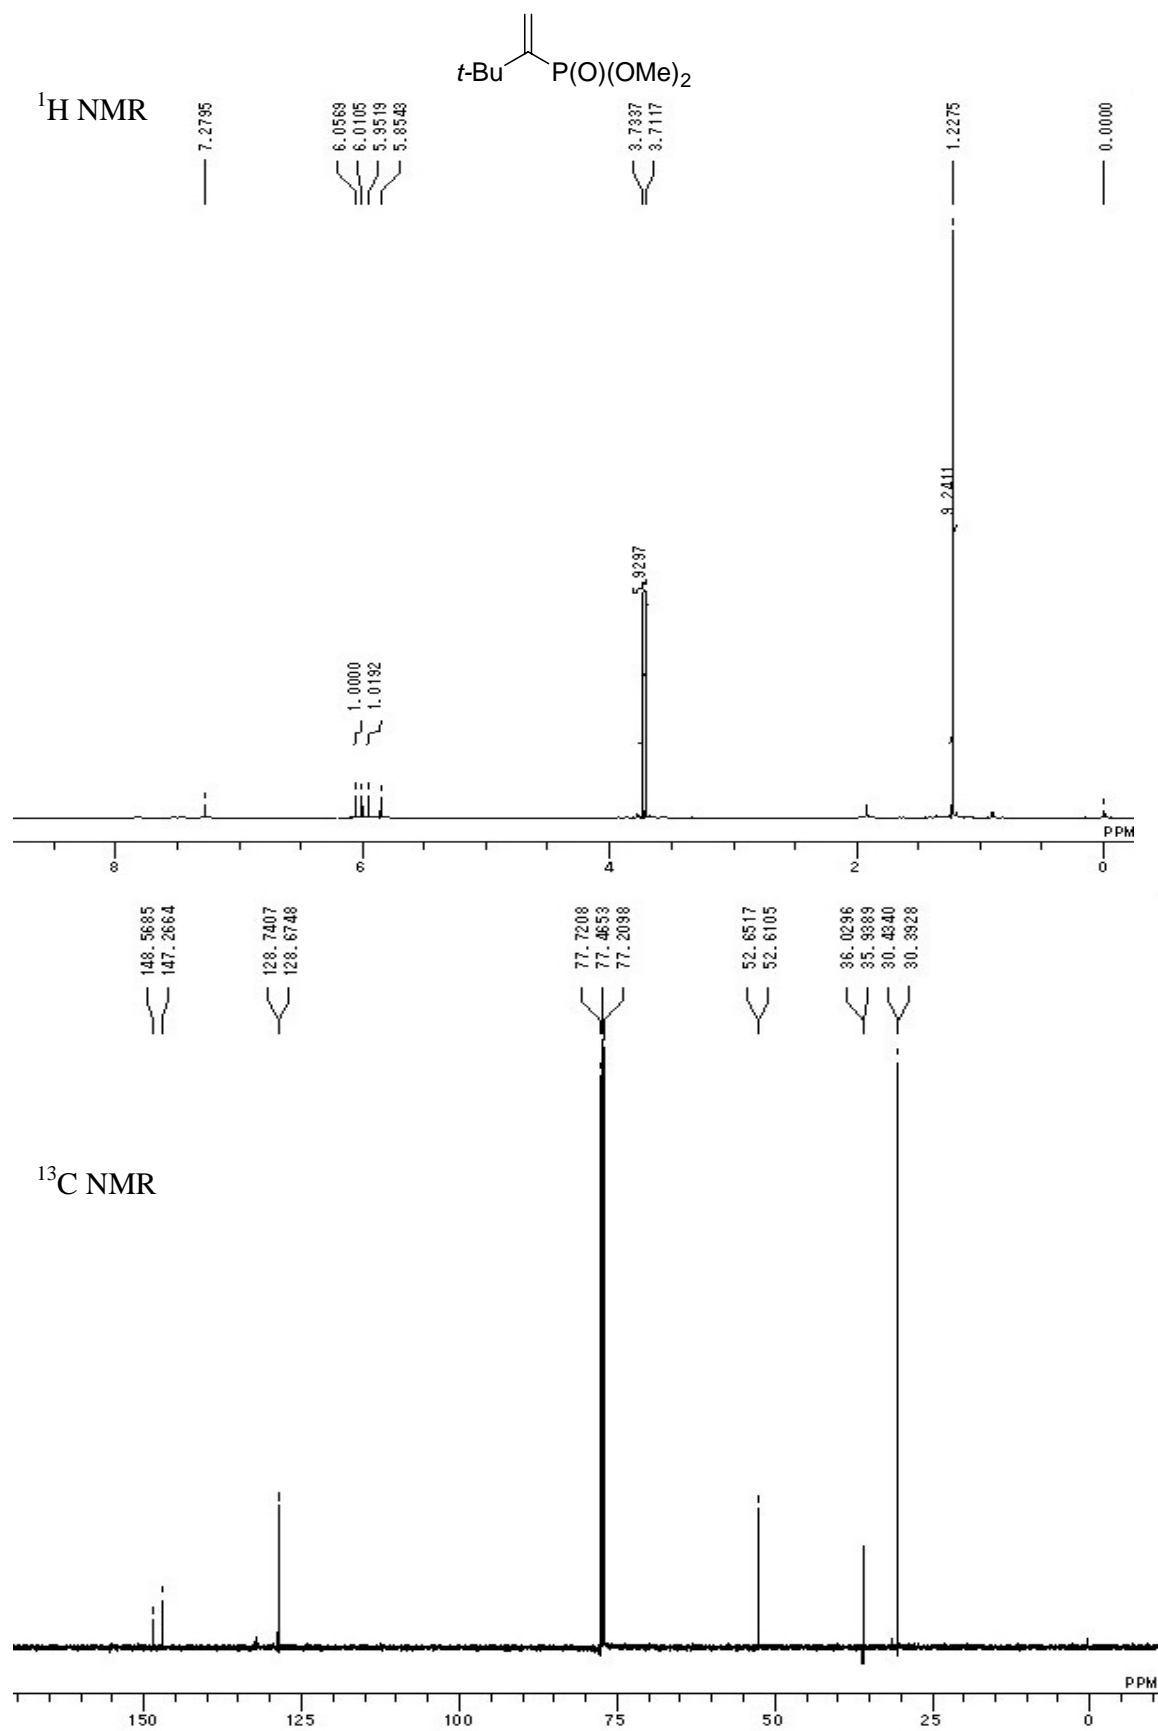

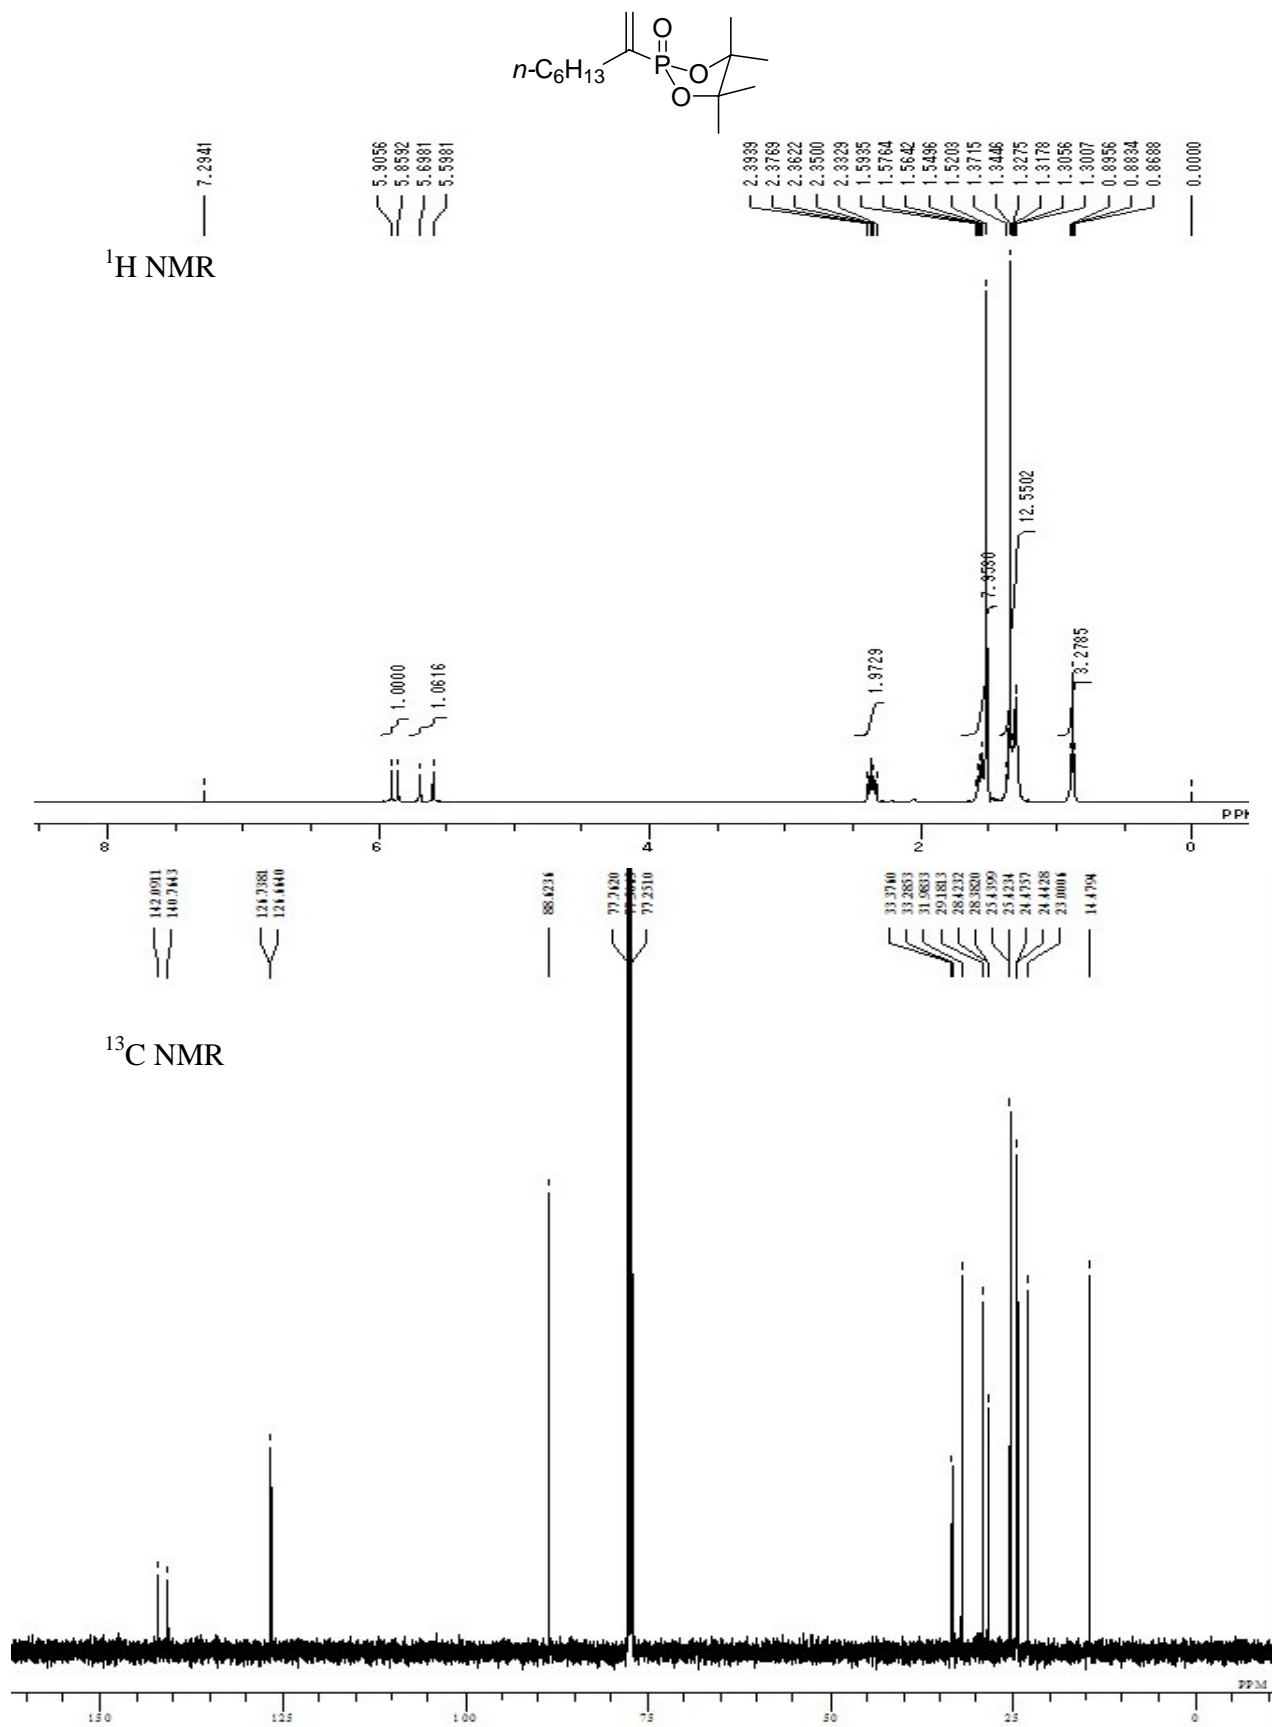

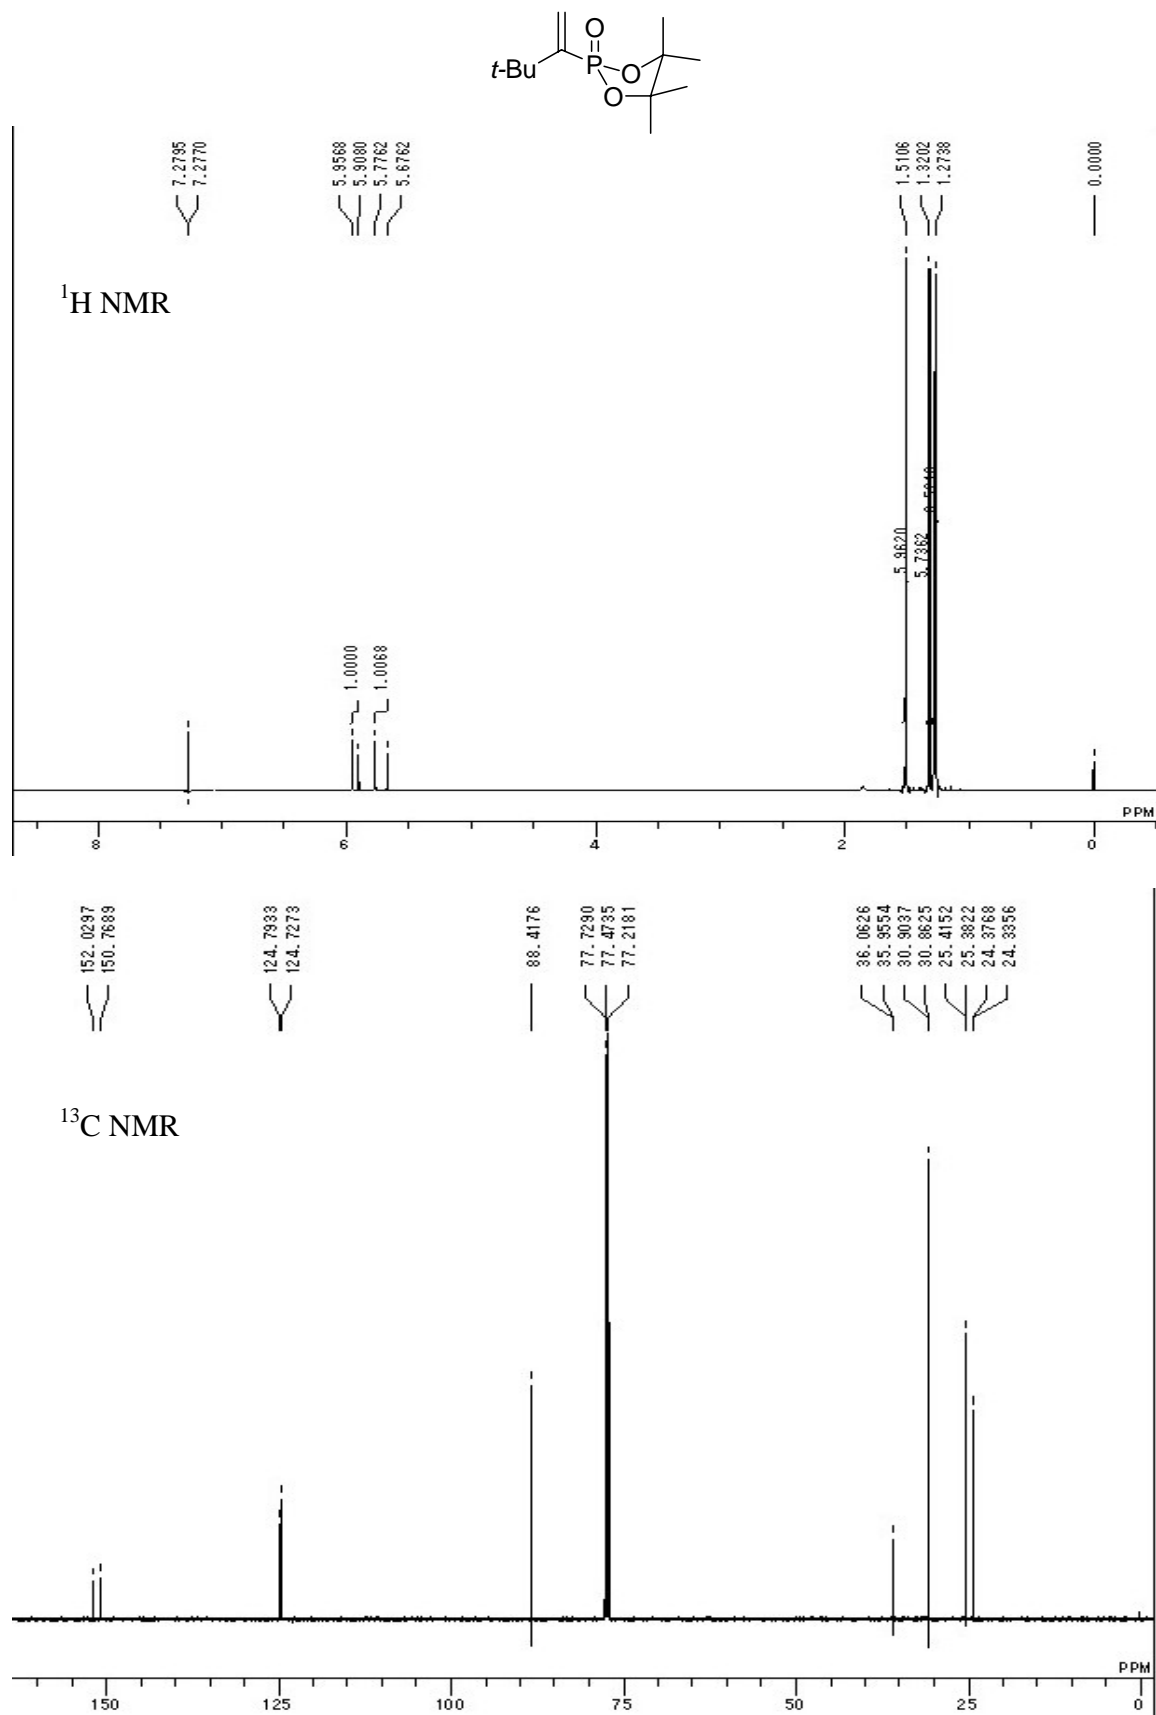

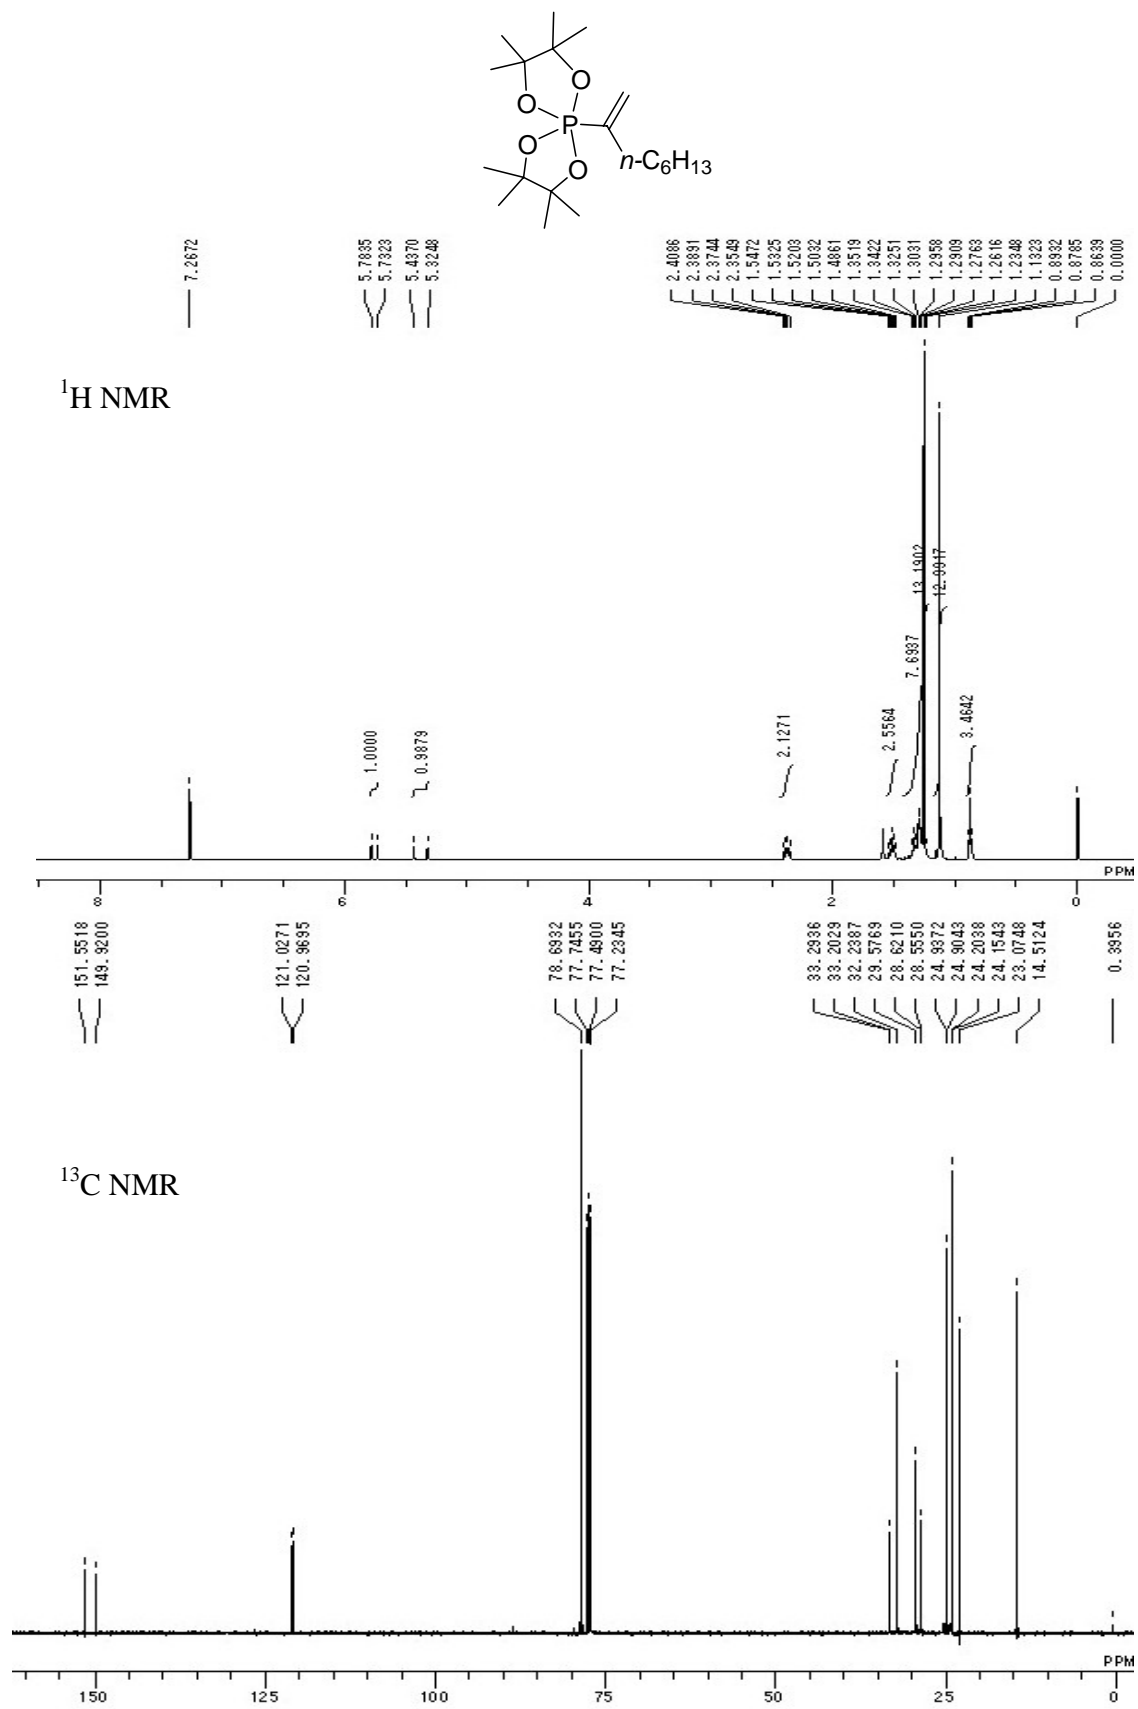



ESI-TOF MS of **3** in CH<sub>2</sub>Cl<sub>2</sub>

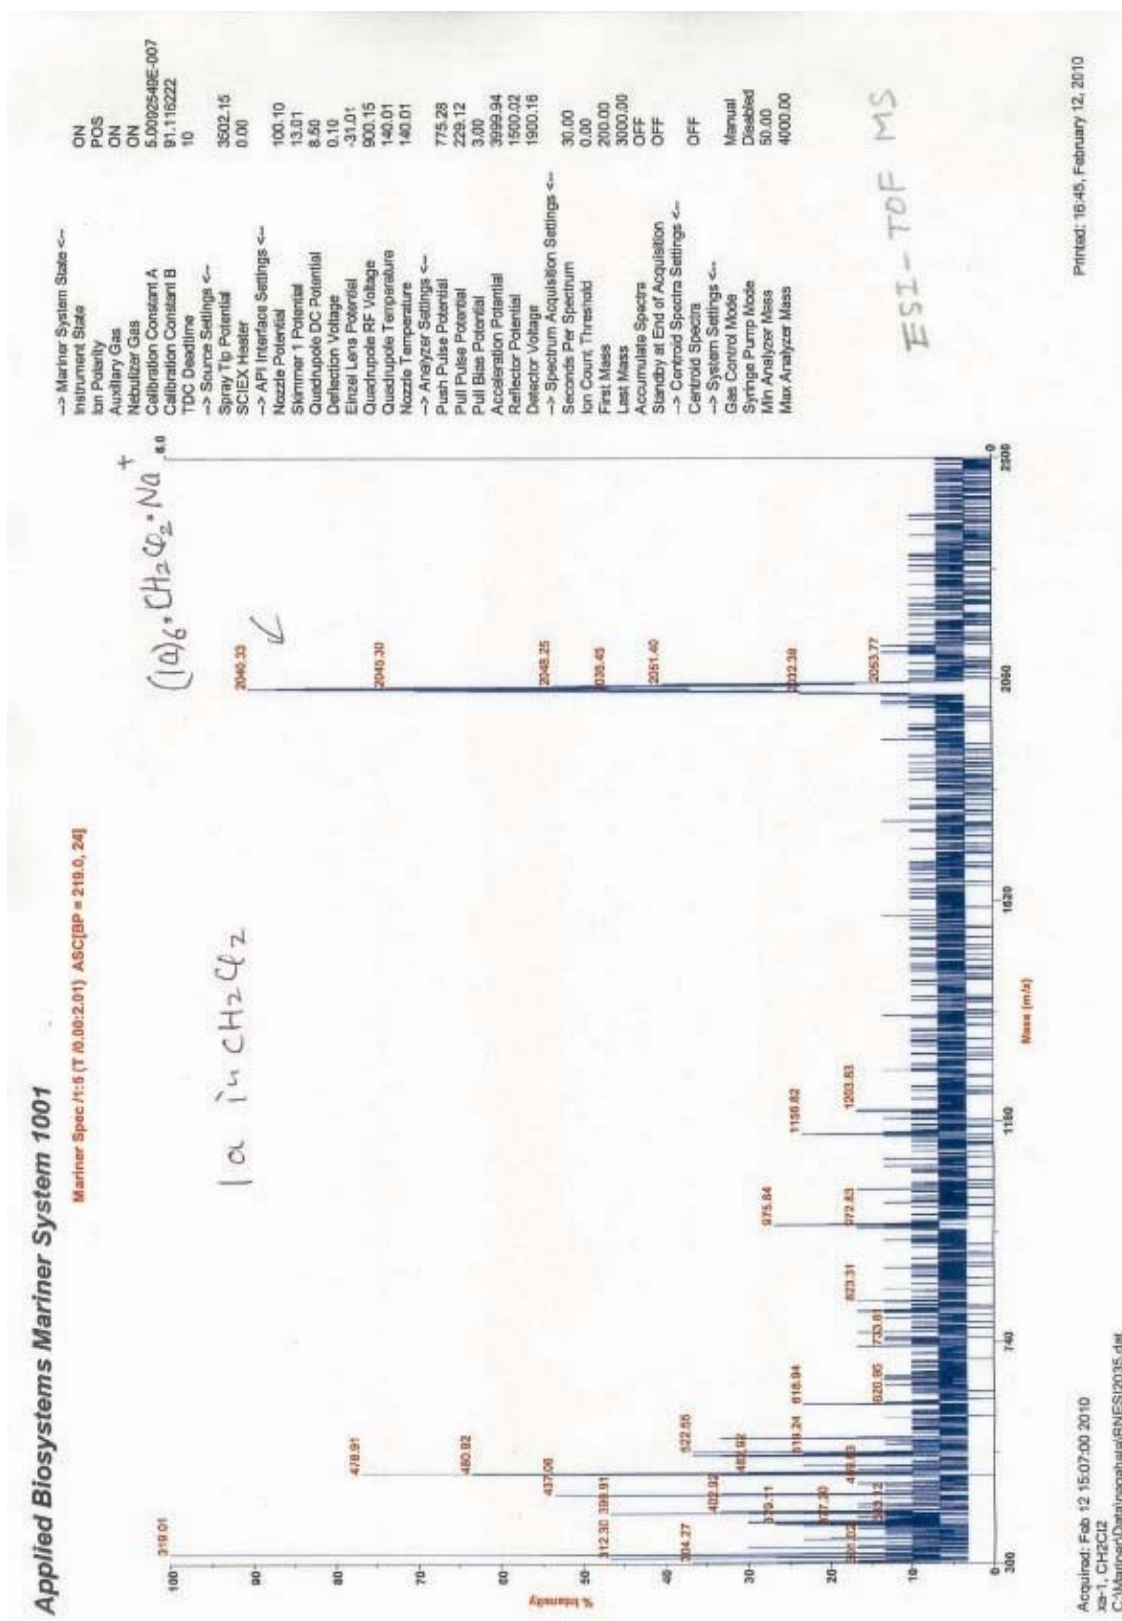

ESI-TOF MS of **3** (with 1% DMSO) in  $\text{CHCl}_3$

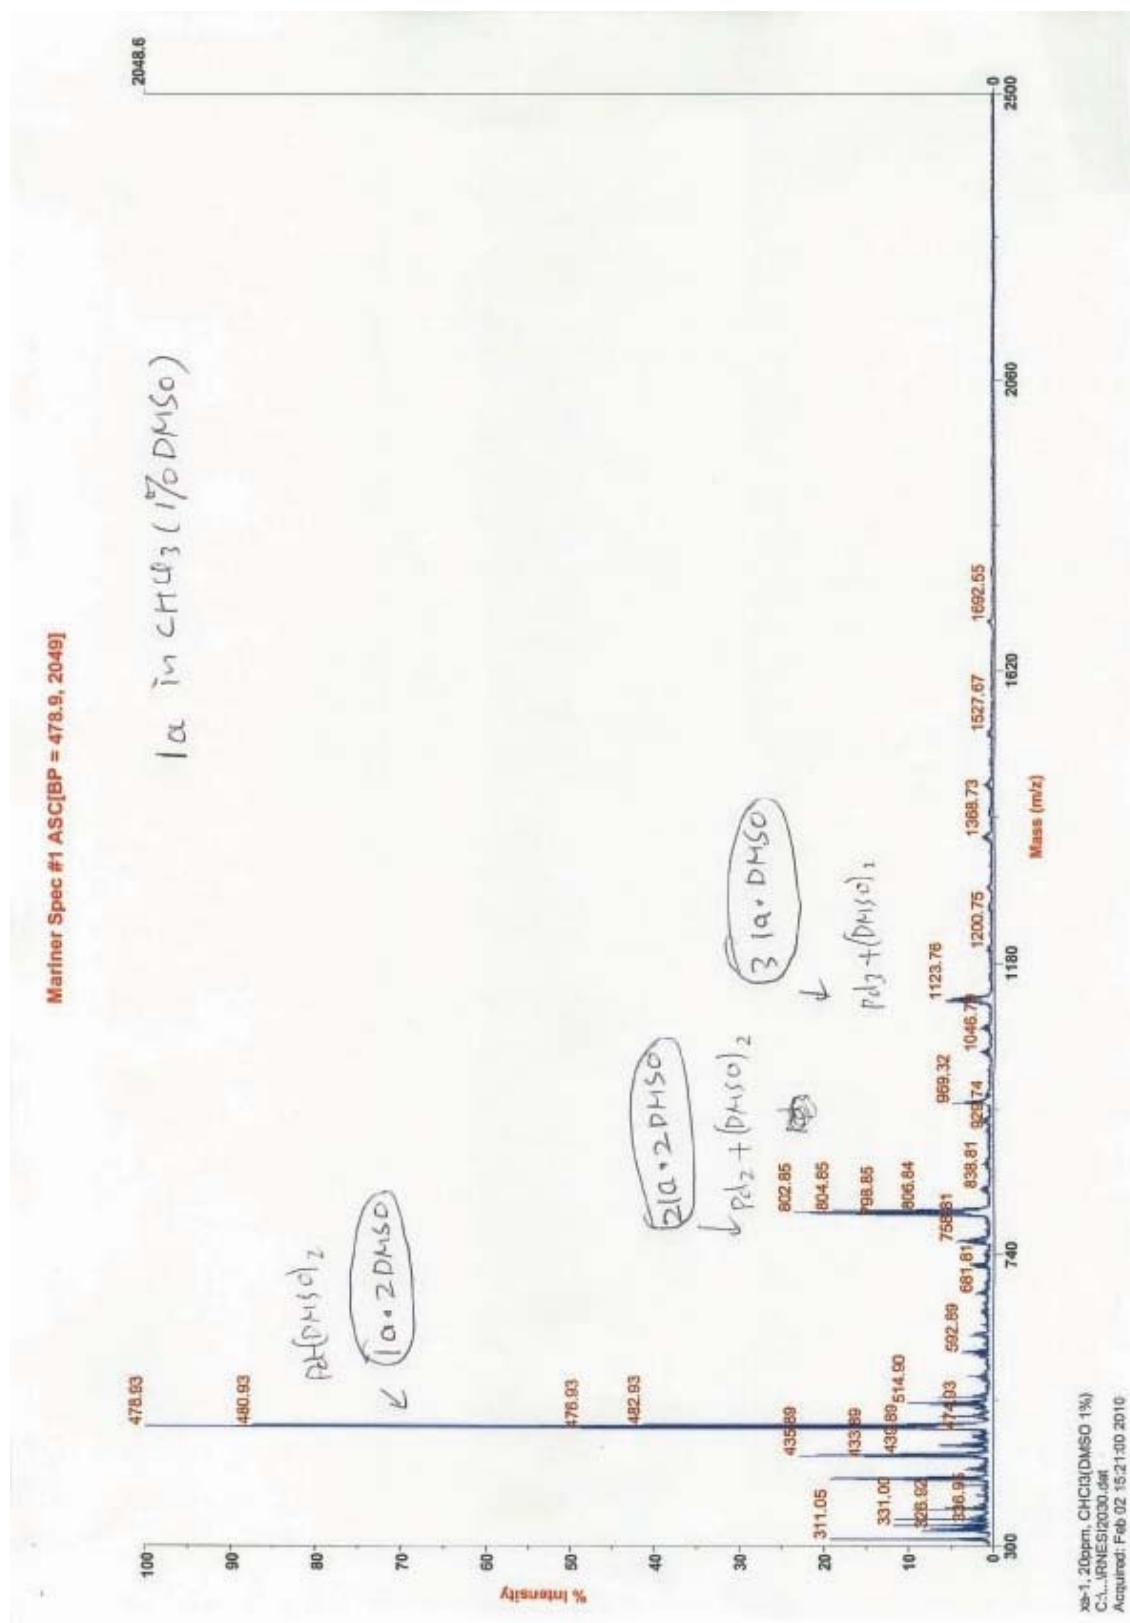

Supplement: c0cc03436c.pdf [file c0cc03436c.pdf]
